# Supplementary material for: Large-Scale Evaluation of Maize Germplasm for Low-Phosphorus Tolerance
Source: PubMed Central journal article supplement (PMC4418814; doi:10.1371/journal.pone.0124212), 2015-05-04
Supplement: pone.0124212.s005.pdf [file pone.0124212.s005.pdf]

S2 Table. Correlation between LPTIs and the relative trait values that were used to calculate the corresponding LPTIs

| Traits | Year | Corr <sup>a</sup> | Corr <sup>b</sup> | Corr <sup>c</sup> |
|--------|------|-------------------|-------------------|-------------------|
| PH23   | 2011 | 0.63              | 0.65              | <b>0.77</b>       |
|        | 2012 | 0.55              | 0.52              | <b>0.59</b>       |
| PH53   | 2011 | 0.69              | 0.76              | 0.71              |
|        | 2012 | 0.53              | 0.60              | 0.57              |
| PH63   | 2011 | 0.68              | 0.77              | 0.70              |
|        | 2012 | 0.55              | 0.62              | 0.61              |
| VL23   | 2011 | 0.56              | 0.44              | <b>0.74</b>       |
|        | 2012 | 0.50              | 0.64              | <b>0.61</b>       |
| VL53   | 2011 | 0.62              | 0.58              | 0.62              |
|        | 2012 | 0.57              | 0.78              | 0.54              |
| VL63   | 2011 | 0.61              | 0.58              | 0.60              |
|        | 2012 | 0.55              | 0.77              | 0.53              |
| NDVI   | 2011 | 0.49              | 0.48              | 0.51              |
| FEW    | 2012 | 0.31              | 0.40              | 0.41              |
